# Supplementary material
Source: MDPI journal article supplement (https://www.mdpi.com/2624-5558/3/3/18)
Supplement: s1 [file s1]

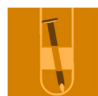

Supplementary File

## Green-High-Performance PMMA–Silica–Li Barrier Coatings

Andressa Trentin <sup>1,2</sup>, Victória Hellen Chagas <sup>1</sup>, Mayara Carla Uvida <sup>1</sup>, Sandra Helena Pulcinelli <sup>1</sup>,  
Celso Valentim Santilli <sup>1</sup> and Peter Hammer <sup>1,\*</sup>

<sup>1</sup> Institute of Chemistry, São Paulo State University (UNESP), Araraquara 14800-060, Brazil; andressa.trentin@tnuni.sk (A.T.); victoria.chagas@unesp.br (V.H.C.); mayara.uvida@unesp.br (M.C.U.); sandra.h.pulcinelli@unesp.br (S.H.P.); cv.santilli@unesp.br (C.V.S.)

<sup>2</sup> FunGlass, Alexander Dubček University of Trenčín, Študentská 2, 911 50 Trenčín, Slovakia

\* Correspondence: peter.hammer@unesp.br; Tel.: +55-16-3301-9887

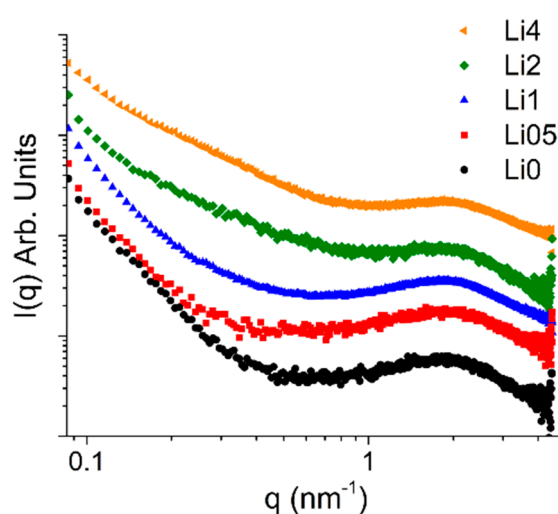

Figure S1. SAXS intensity profiles of hybrid duplicates prepared with different concentrations of lithium carbonate.

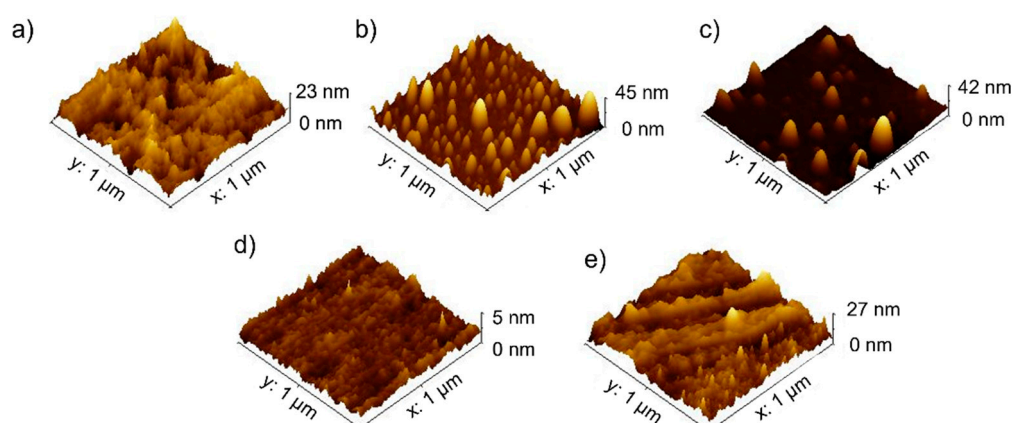

Figure S2. AFM images of the surfaces of duplicates of PMMA-silica coatings prepared with increasing concentrations of lithium; a) Li0 (PMMA-silica), b) Li05, c) Li1, d) Li2, e) Li4.

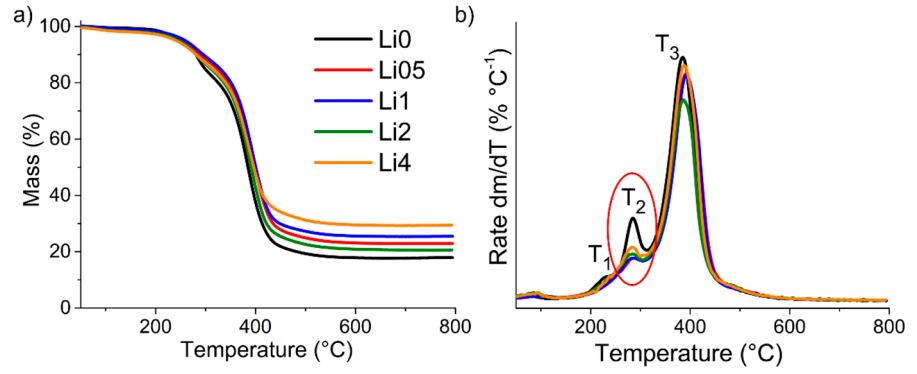

Figure S3. a) TG curves and b) dTG (first derivative of the TG curve) of duplicates of PMMA-silica coatings with different lithium concentrations.

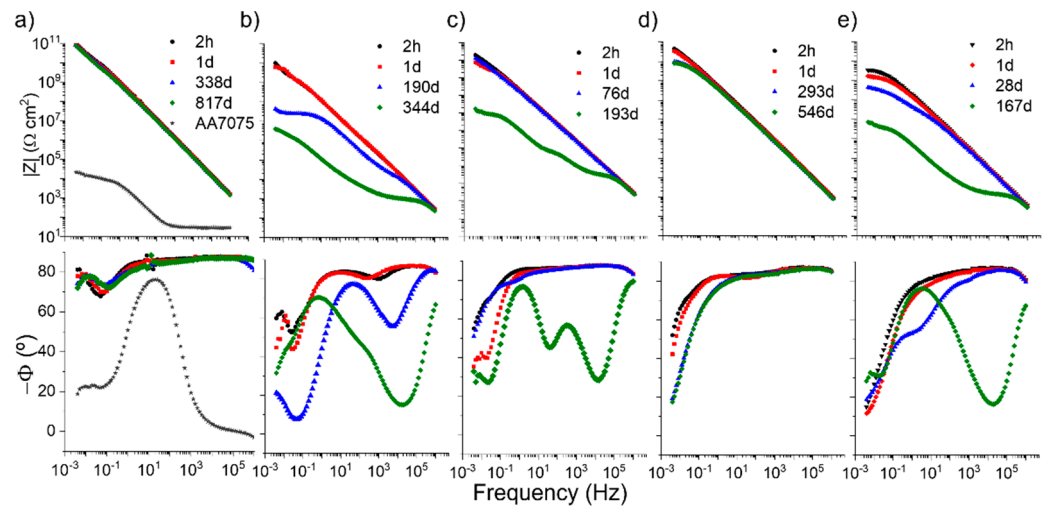

Figure S4. Bode plots as a function of time recorded for duplicates of PMMA-silica coatings with and without lithium addition; a) Li0 (PMMA-silica), b) Li05, c) Li1, d) Li2, e) Li4.

Table S1. Electrochemical parameters obtained by fitting EIS data using the EEC of Figure 7 for the intact coatings in the first and last days of exposure to NaCl 3.5% solution. The values in brackets correspond to the error (%) of each parameter.

| Coating                                              | Li0                  |                      | Li05                 |                      | Li1                  |                      | Li2                  |                      | Li4                  |                      |
|------------------------------------------------------|----------------------|----------------------|----------------------|----------------------|----------------------|----------------------|----------------------|----------------------|----------------------|----------------------|
|                                                      | 2h                   | 430d                 | 2h                   | 446d                 | 2h                   | 768d                 | 2h                   | 872d                 | 2h                   | 411d                 |
| $\chi^2$                                             | $3.9 \times 10^{-4}$ | $4.7 \times 10^{-4}$ | $2.5 \times 10^{-3}$ | $4.0 \times 10^{-4}$ | $3.1 \times 10^{-4}$ | $3.2 \times 10^{-4}$ | $1.7 \times 10^{-3}$ | $8.8 \times 10^{-4}$ | $4.9 \times 10^{-3}$ | $3.9 \times 10^{-3}$ |
| $R_s$ ( $\Omega \text{ cm}^2$ )                      | 31                   | 28                   | 29                   | 25                   | 19                   | 19                   | 25                   | 24                   | 72                   | 67                   |
| $R_1$ ( $M\Omega \text{ cm}^2$ )                     | 45 (11)              | 64 (8)               | 27 (13)              | 4 (18)               | 13 (10)              | 2 (15)               | 29 (17)              | 2.4 (0.2)            | 0.02 (14)            | $2.2 \times 10^{-3}$ |
| $Q_1$ ( $n\Omega^{-1} \text{ cm}^{-2} \text{ s}^n$ ) | 0.25 (0.5)           | 0.34 (0.5)           | 0.83 (2)             | 1.0 (0.9)            | 0.86 (0.5)           | 0.98 (1.2)           | 0.29 (7)             | 0.41 (3)             | 0.53 (9)             | 270 (13)             |
| $n_1$                                                | 0.97 (0.04)          | 0.95 (0.04)          | 0.96 (0.15)          | 0.96 (0.07)          | 0.97 (0.04)          | 0.97 (0.09)          | 0.96 (0.51)          | 0.95 (0.24)          | 0.97 (0.62)          | 0.75 (1.22)          |
| $R_2$ ( $G\Omega \text{ cm}^2$ )                     | 1290 (6.8)           | 95 (0.7)             | 191 (12.2)           | 10.7 (0.7)           | 71.2 (1.3)           | 0.3 (0.8)            | 122 (11.7)           | 0.6 (14.1)           | 1.4 (1.1)            | $4.3 \times 10^{-3}$ |
| $Q_2$ ( $n\Omega^{-1} \text{ cm}^{-2} \text{ s}^n$ ) | 0.08 (1.6)           | 0.07 (2.5)           | 0.12 (9.2)           | 0.45 (2.1)           | 0.29 (1.4)           | 0.92 (1.6)           | 0.09 (4.5)           | 0.69 (10.4)          | 1.05 (4.4)           | 366 (1.7)            |
| $n_2$                                                | 0.75 (0.35)          | 0.85 (0.33)          | 0.53 (1.53)          | 0.66 (0.83)          | 0.74 (0.33)          | 0.60 (1.4)           | 0.44 (2.01)          | 0.55 (1.66)          | 0.74 (1.97)          | 0.77 (0.34)          |
| $R_3$ ( $G\Omega \text{ cm}^2$ )                     |                      |                      |                      |                      |                      | 150 (14)             |                      | 7.3 (4)              |                      | $2.0 \times 10^{-3}$ |
| $Q_3$ ( $n\Omega^{-1} \text{ cm}^{-2} \text{ s}^n$ ) |                      |                      |                      |                      |                      | 21.8 (0.8)           |                      | 1.4 (6.4)            |                      | 71300                |
| $n_3$                                                |                      |                      |                      |                      |                      | 0.89 (0.39)          |                      | 0.68 (1.36)          |                      | 0.40 (2.62)          |
